# Supplementary material for: Hierarchical structured polymers for light-absorption enhancement of silicon-based solar power systems
Source: Royal Society of Chemistry journal article supplement (doi:10.1039/c6ra08030h), 2016-01-01
Supplement: c6ra08030h1.pdf [file c6ra08030h1.pdf]

# Hierarchical structured polymers for light-absorption enhancement of silicon-based solar power systems

Jung Woo Leem,<sup>‡</sup> Minkyu Choi,<sup>‡</sup> Bhaskar Dudem, and Jae Su Yu\*

*Department of Electronics and Radio Engineering, Kyung Hee University,  
1732 Deogyong-daero, Giheung-gu, Yongin-si, Gyeonggi-do 17104, South Korea*

\*Authors to whom correspondence should be addressed:

[jsyu@khu.ac.kr](mailto:jsyu@khu.ac.kr)

<sup>‡</sup>These authors contributed equally to this work

**Supporting Information**

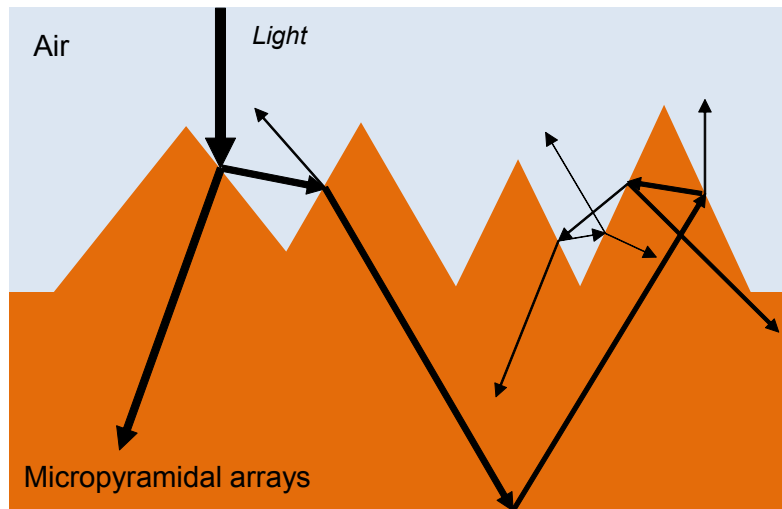

**Fig. S1** Schematic diagram of the mechanism for the extension of effective optical path lengths in micropyramidal arrays.

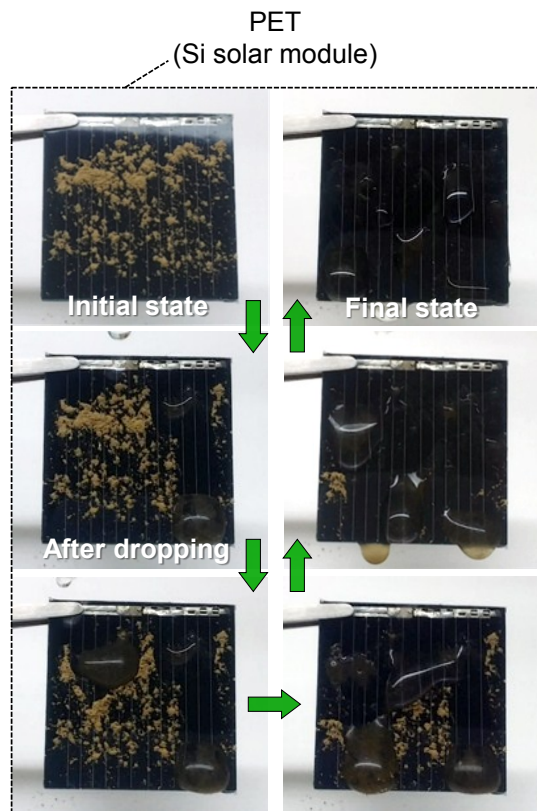

**Fig. S2** Sequential photographs for a cleaning behaviour of the reference Si solar module with the bare PET cover by water droplets.

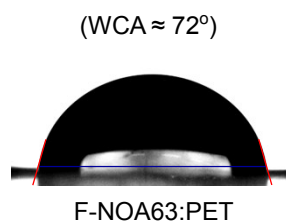

**Fig. S3** Photograph of a water droplet on the surface of the flat NOA63 film:PET (F-NOA63:PET).

**Table S1.** Average total transmittance ( $T_{avg}$ ) and solar weight transmittance ( $T_{sw}$ ) of HS-NOA63:PET samples for different RHS-PDMS stamps via one HS-Si mold.

| Stamp                        |               | HS-Si mold                                |                 |                 |                 |                 |
|------------------------------|---------------|-------------------------------------------|-----------------|-----------------|-----------------|-----------------|
|                              |               | RHS-PDMS (No.1)                           | RHS-PDMS (No.2) | RHS-PDMS (No.3) | RHS-PDMS (No.4) | RHS-PDMS (No.5) |
| HS-NOA63:PET (No.1)          | $T_{avg}$ (%) | 94.04 <sup>(a)</sup> ±0.17 <sup>(b)</sup> | 94.10±0.01      | 94.06±0.02      | 94.06±0.11      | 94.03±0.04      |
|                              | $T_{sw}$ (%)  | 94.20±0.19                                | 94.21±0.01      | 94.19±0.02      | 94.17±0.12      | 94.13±0.03      |
| HS-NOA63:PET (No.2)          | $T_{avg}$ (%) | 94.16±0.04                                | 94.17±0.21      | 93.96±0.07      | 94.00±0.10      | 93.87±0.11      |
|                              | $T_{sw}$ (%)  | 94.26±0.03                                | 94.27±0.19      | 94.09±0.06      | 94.10±0.09      | 94.00±0.11      |
| HS-NOA63:PET (No.3)          | $T_{avg}$ (%) | 93.96±0.18                                | 93.98±0.09      | 94.13±0.08      | 93.94±0.02      | 93.99±0.06      |
|                              | $T_{sw}$ (%)  | 94.05±0.20                                | 94.11±0.10      | 94.24±0.08      | 94.05±0.01      | 94.10±0.05      |
| HS-NOA63:PET (No.4)          | $T_{avg}$ (%) | 94.05±0.02                                | 94.02±0.07      | 93.97±0.13      | 93.76±0.11      | 93.93±0.08      |
|                              | $T_{sw}$ (%)  | 94.20±0.01                                | 94.18±0.06      | 94.06±0.15      | 93.86±0.08      | 94.04±0.10      |
| HS-NOA63:PET (No.5)          | $T_{avg}$ (%) | 93.95±0.15                                | 94.01±0.14      | 94.03±0.16      | 93.82±0.07      | 94.09±0.04      |
|                              | $T_{sw}$ (%)  | 94.03±0.15                                | 94.20±0.15      | 94.16±0.16      | 93.90±0.05      | 94.18±0.03      |
| HS-NOA63:PET (No.6)          | $T_{avg}$ (%) | 93.90±0.16                                | -               | -               | -               | -               |
|                              | $T_{sw}$ (%)  | 94.01±0.16                                | -               | -               | -               | -               |
| HS-NOA63:PET (No.7)          | $T_{avg}$ (%) | 93.87±0.27                                | -               | -               | -               | -               |
|                              | $T_{sw}$ (%)  | 93.96±0.30                                | -               | -               | -               | -               |
| HS-NOA63:PET (No.8)          | $T_{avg}$ (%) | 93.77±0.19                                | -               | -               | -               | -               |
|                              | $T_{sw}$ (%)  | 93.88±0.20                                | -               | -               | -               | -               |
| Average value for each stamp | $T_{avg}$ (%) | 93.94±0.15                                | 94.06±0.14      | 94.03±0.11      | 93.96±0.12      | 93.98±0.09      |
|                              | $T_{sw}$ (%)  | 94.05±0.16                                | 94.19±0.12      | 94.14±0.11      | 94.06±0.12      | 94.09±0.09      |

From one HS-Si mold, five HS-NOA63:PET samples or more for each RHS-PDMS stamp were fabricated in the same fabrication process. The transmittance spectra of all the HS-NOA63:PET samples were measured at two or three times in a wavelength range of 380-1100 nm.

(a): Average value, (b): Standard deviation in parentheses
